# Supplementary material
Source: HighWire-hosted journal article supplement (https://bmjopen.bmj.com/content/8/7/e021401)
Supplement: inline-supplementary-material-1 [file inline-supplementary-material-1.pdf]

Supplementary Table (1). Factors associated with vitamin D deficiency among adolescents in univariate analysis.

| Characteristics                          | Total<br>n=1150 | Prevalence of<br>vitamin D<br>deficiency<br>(%) | Prevalence Ratio<br>[95%CI] | p      |
|------------------------------------------|-----------------|-------------------------------------------------|-----------------------------|--------|
| <b>Gender</b>                            |                 |                                                 |                             |        |
| Male                                     | 694             | 488 (70.32)                                     | 1 [Ref.]                    | <0.001 |
| Female                                   | 722             | 662 (91.69)                                     | 1.30 [1.26- 1.33]           |        |
| <b>Age (year)</b>                        |                 |                                                 |                             |        |
| <12                                      | 527             | 409 (77.61)                                     | 1 [Ref.]                    | 0.024  |
| 12-                                      | 439             | 369 (84.05)                                     | 1.07 [1.01- 1.12]           |        |
| ≥13                                      | 450             | 372 (82.67)                                     | 1.06 [1.00- 1.10]           |        |
| <b>Nationality</b>                       |                 |                                                 |                             |        |
| Kuwaiti                                  | 1081            | 900 (83.26)                                     | 1 [Ref.]                    | <0.001 |
| Non-Kuwait                               | 335             | 250 (74.63)                                     | 0.90 [0.82-0.96]            |        |
| <b>Governorate</b>                       |                 |                                                 |                             |        |
| Capital                                  | 156             | 127 (81.41)                                     | 1 [Ref.]                    | 0.003  |
| Hawally                                  | 246             | 188 (76.42)                                     | 0.94 [0.82-1.03]            |        |
| Farawanya                                | 236             | 183 (77.54)                                     | 0.95 [0.83-1.04]            |        |
| Jahra                                    | 239             | 214 (89.54)                                     | 1.10 [1.02-1.15]            |        |
| Mubarak al-Kabeer                        | 148             | 124 (83.78)                                     | 1.03 [0.91-1.10]            |        |
| Ahmadi                                   | 371             | 296 (79.78)                                     | 0.98 [0.88-1.06]            |        |
| <b>Father's Education</b>                |                 |                                                 |                             |        |
| Primary/Intermediate/no formal education | 236             | 205 (86.86)                                     | 1 [Ref.]                    | <0.001 |
| Secondary (high school)                  | 344             | 297 (86.34)                                     | 0.99 [0.87-1.08]            |        |
| Diploma                                  | 261             | 220 (84.29)                                     | 0.95 [0.82-1.06]            |        |
| University & above                       | 542             | 399 (73.62)                                     | 0.78 [0.65-0.90]            |        |
| <b>Mother's Education</b>                |                 |                                                 |                             |        |
| Primary/Intermediate/no formal education | 183             | 153 (83.61)                                     | 1 [Ref.]                    | <0.001 |
| Secondary (high school)                  | 304             | 263 (86.51)                                     | 1.04 [0.94-1.12]            |        |
| Diploma                                  | 304             | 259 (85.20)                                     | 1.02 [0.91-1.10]            |        |
| University & above                       | 605             | 457 (75.54)                                     | 0.88 [0.76-0.99]            |        |
| <b>Total number of brother/sisters</b>   |                 |                                                 |                             |        |
| Zero-two                                 | 298             | 223 (74.83)                                     | 1 [Ref.]                    | 0.002  |
| Three-four                               | 538             | 434 (80.67)                                     | 1.05 [1.00-1.10]            |        |
| Five or more                             | 553             | 469 (84.81)                                     | 1.10 [1.04-1.13]            |        |
| <b>Passive smoking at household</b>      |                 |                                                 |                             |        |
| No                                       | 901             | 704 (78.14)                                     | 1 [Ref.]                    | <0.001 |
| Yes                                      | 489             | 426 (87.12)                                     | 1.11 [1.06-1.15]            |        |

|                                                               |       |               |      |             |        |
|---------------------------------------------------------------|-------|---------------|------|-------------|--------|
| <b>Times per week consumed breakfast not prepared at home</b> |       |               |      |             |        |
| Zero                                                          | 624   | 484 (77.56)   | 1    | [Ref.]      | 0.019  |
| One-two times                                                 | 569   | 478 (84.01)   | 1.08 | [1.02-1.12] |        |
| Three-four                                                    | 117   | 98 (83.76)    | 1.07 | [0.97-1.14] |        |
| Five or more                                                  | 78    | 67 (85.90)    | 1.10 | [1.00-1.17] |        |
| <b>Times per week consumed dinner not prepared at home</b>    |       |               |      |             |        |
| Zero                                                          | 157   | 114 (72.61)   | 1    | [Ref.]      | 0.018  |
| One-two times                                                 | 878   | 719 (81.89)   | 1.09 | [1.03-1.14] |        |
| Three-four                                                    | 257   | 211 (82.10)   | 1.09 | [1.01-1.15] |        |
| Five or more                                                  | 86    | 75 (87.21)    | 1.14 | [1.04-1.19] |        |
| <b>Consumption of sugary drinks per week</b>                  |       |               |      |             |        |
| None                                                          | 171   | 123 (71.93)   | 1    | [Ref.]      | 0.002  |
| Once-Three times                                              | 772   | 633 (81.99)   | 1.09 | [1.04-1.14] |        |
| Four-Six                                                      | 171   | 135 (78.95)   | 1.07 | [0.98-1.13] |        |
| Seven/more                                                    | 299   | 256 (85.62)   | 1.12 | [1.07-1.17] |        |
| <b>Currently taking supplements</b>                           |       |               |      |             |        |
| No                                                            | 1,256 | 1,045 (83.20) | 1    | [Ref.]      | <0.001 |
| Yes                                                           | 158   | 103 (65.19)   | 0.78 | [0.68-0.88] |        |
| <b>Number of times walking to school per week</b>             |       |               |      |             |        |
| None                                                          | 1,158 | 982 (84.80)   | 1    | [Ref.]      | <0.001 |
| 1-8 times                                                     | 155   | 99 (63.87)    | 0.74 | [0.63-0.83] |        |
| Every day                                                     | 103   | 69 (66.99)    | 0.77 | [0.65-0.89] |        |
| <b>Time walking to school</b>                                 |       |               |      |             |        |
| None                                                          | 1,158 | 982 (84.80)   | 1    | [Ref.]      | <0.001 |
| ≤5 minutes                                                    | 80    | 50 (62.50)    | 0.71 | [0.56-0.84] |        |
| 6- 10 minutes                                                 | 76    | 53 (69.74)    | 0.80 | [0.65-0.93] |        |
| 11-15                                                         | 56    | 38 (67.86)    | 0.77 | [0.60-0.92] |        |
| 16 minutes or more                                            | 45    | 26 (57.78)    | 0.65 | [0.46-0.82] |        |
| <b>Time spent on physical activity per week</b>               |       |               |      |             |        |
| Low (lower tertile)                                           | 469   | 396 (84.43)   | 1    | [Ref.]      | 0.005  |
| Medium (middle tertile)                                       | 473   | 391 (82.66)   | 0.97 | [0.89-1.04] |        |
| High (higher tertile)                                         | 474   | 363 (76.58)   | 0.89 | [0.80-0.96] |        |
| <b>Body Mass Index Categories<sup>1</sup></b>                 |       |               |      |             |        |
| Normal weight                                                 | 601   | 465 (77.37)   | 1    | [Ref.]      | 0.001  |
| Overweight                                                    | 320   | 270 (84.38)   | 1.07 | [1.02-1.11] |        |

|                                                         |       |             |      |             |        |
|---------------------------------------------------------|-------|-------------|------|-------------|--------|
| Obese                                                   | 471   | 400 (84.93) | 1.08 | [1.03-1.11] |        |
| Under weight                                            | 24    | 15 (62.50)  | 0.84 | [0.59-1.02] |        |
| <b>Time outside per day 10:00 am- 4:00 pm week days</b> |       |             |      |             |        |
| Less than 30 minutes                                    | 657   | 563 (85.69) | 1    | [Ref.]      | <0.001 |
| 31 minutes to 1 hour                                    | 450   | 342 (76.00) | 0.87 | [0.80-0.94] |        |
| More than 1 hour to 2 hours                             | 222   | 178 (80.18) | 0.93 | [0.84-1.00] |        |
| More than 2 hours                                       | 87    | 67 (77.01)  | 0.88 | [0.74-0.99] |        |
| <b>Time outside per day 10:00 am- 4:00 pm week ends</b> |       |             |      |             |        |
| Less than 30 minutes                                    | 494   | 425 (86.03) | 1    | [Ref.]      | 0.003  |
| 31 minutes to 1 hour                                    | 312   | 257 (82.37) | 0.94 | [0.85-1.02] |        |
| More than 1 hour to 2 hours                             | 255   | 198 (77.65) | 0.87 | [0.76-0.96] |        |
| More than 2 hours to 3 hours                            | 185   | 142 (76.76) | 0.85 | [0.74-0.96] |        |
| More than 3 hours                                       | 169   | 127 (75.15) | 0.83 | [0.71-0.94] |        |
| <b>Wearing sunscreen</b>                                |       |             |      |             |        |
| Never                                                   | 1,100 | 874 (79.45) | 1    | [Ref.]      | 0.013  |
| Rarely                                                  | 77    | 65 (84.42)  | 1.06 | [0.94-1.13] |        |
| Sometimes                                               | 160   | 140 (87.50) | 1.09 | [1.02-1.14] |        |
| Often/always                                            | 79    | 71 (89.87)  | 1.12 | [1.02-1.18] |        |
| <b>Staying in shade or under an umbrella</b>            |       |             |      |             |        |
| Never                                                   | 493   | 396 (80.32) | 1    | [Ref.]      | 0.04   |
| Rarely                                                  | 97    | 70 (72.16)  | 0.90 | [0.78-1.01] |        |
| Sometimes                                               | 363   | 301 (82.92) | 1.03 | [0.96-1.08] |        |
| Often                                                   | 205   | 162 (79.02) | 0.98 | [0.90-1.05] |        |
| Always                                                  | 257   | 220 (85.60) | 1.06 | [0.99-1.11] |        |

%s are row percentages. <sup>1</sup>according to WHO growth charts.
